# Supplementary material
Source: publisher site journal article supplement (https://www.spandidos-publications.com/3137/downloadSupplementary)

## Data S1

Supplementary material is provided below on preliminary experiments concerning the effect of NSAIDs and prednisolone on the expression of *Runx2* and *Bsp* genes in MC3T3-E1 cells.

**RNA extraction and reverse-transcription quantitative PCR (RT-qPCR).** MC3T3-E1 cells were seeded at  $5 \times 10^5$  cells per well (6-well plate) in culture medium. On day 1, culture medium was changed into osteogenic medium (as described in the Materials and methods section) and cells were treated with drugs ( $10^{-6}$  M) for 1 or 7 days. Then, the cells were directly lysed by the addition of 1 mL Trizol (Invitrogen) and total RNA was extracted with the Miniprep RNA isolation kit (Macherey-Nagel EURL, France), followed by DNase treatment (Invitrogen). One  $\mu$ g RNA was subjected to Thermoscript RT-PCR (Invitrogen) using poly(dT) as primers. Real-time PCR was performed with KAPA SYBR Green Fast Universal qPCR Kit (KAPA Biosystems) in a Mx3000P apparatus (Stratagene) under the following conditions: 40 cycles of 95°C for 30 sec. Triplicate RNA samples of two different experiments were analysed with each set of primers for *Bsp* (F 5'-TCCATCGAAGAATCAAAGCA-3' and R 5'-ATGAGCGTGGCCGGTACTTA-3') and *Runx2* (F 5'-GACGTGCCCAGGCGTATTTC-3' and R 5'-AAGTCTGGGTCCGTCAAGG-3') genes. The relative mRNA expression levels were calculated from the threshold cycle (Ct) value of each PCR product and normalized with that of the 18S gene

(F 5'-TTGAACCCCATTCATCCA-3' and R 5'-CCATCC AATCGGTAGTAGCG-3') using the comparative Ct method (51). The relative quantity of the expression of each gene from the control (untreated) cells was set to 1, and values from the drug-treated cells were expressed as a relative fold. Statistical analysis for the qPCR experiments was performed using t-test and comparison of nonparametric results between groups was performed with the Mann-Whitney U test (SPSS Software). A p value <0.05 was considered significant. Results are expressed as mean values  $\pm$  standard error to the mean (SEM).

**Gene expression of *Runx2* and *Bsp*.** We present preliminary results on the impact of the NSAID drugs and prednisolone treatment on the gene expression of differentiating MC3T3-E1 cells. The mRNA expressions of *Runx2* and *Bsp* bone related genes, were measured after treatment of cells with NSAIDs or prednisolone for 1 or 7 days, respectively. Data from quantitative real time PCR (Fig. S1) show that none of the tested drugs decreased the expression of either *Runx2* or *Bsp1*. On the contrary, gene expression of the early osteogenic transcription factor *Runx2* was induced by lornoxicam and parecoxib treatment. *Runx2* expression was even more significantly increased by paracetamol. The expression of bone sialoprotein (*Bsp1*) was increased only by the non-selective drugs diclofenac and lornoxicam among the NSAIDs investigated. Interestingly, prednisolone exerted the strongest effect, increasing *Bsp* mRNA levels by approximately 40-fold over the control.

Figure S1. mRNA expression levels of (A) *Runx2* and (B) *Bsp* in cells treated with NSAIDs or prednisolone for 1 or 7 days in osteogenic medium, respectively. Expression levels were normalized to the *18S* housekeeping gene. Cells in non-osteogenic medium (control) and cells in osteogenic medium (osteogen. M) are shown for comparison. Each bar represents the mean  $\pm$  SE, of triplicate technical and duplicate biological samples in two independent experiments (n=12); statistical analysis was performed using a t-test. \*P<0.05 vs. untreated control. NSAIDs, Nonsteroidal anti-inflammatory drugs.

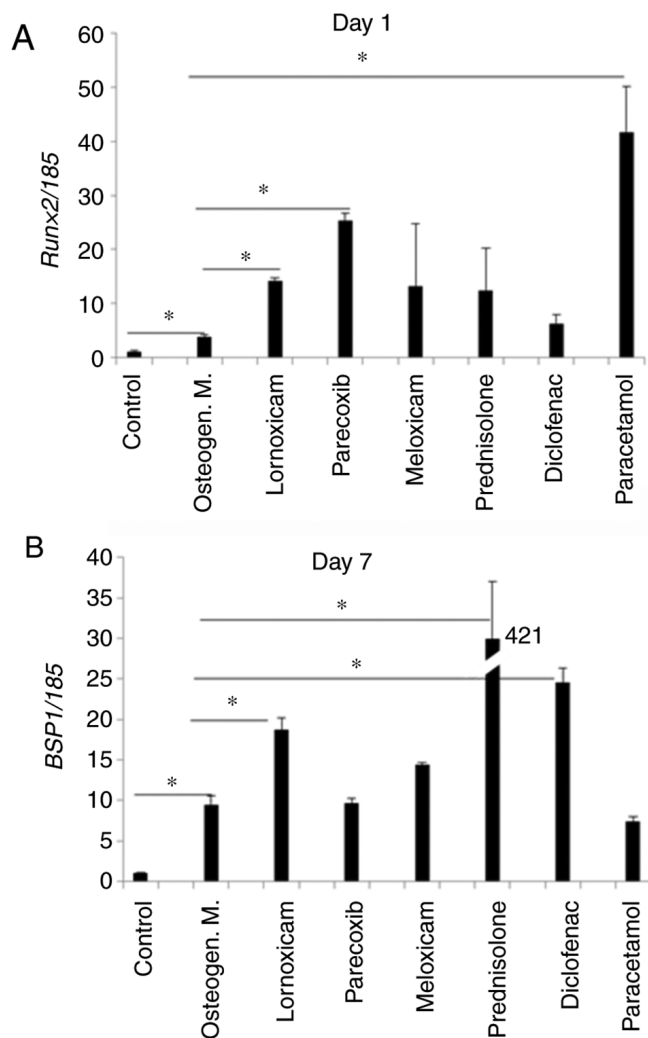

Supplement: Supplementary file 1 [file downloadSupplementary]
